# Supplementary material for: The potential of CAM crops as a globally significant bioenergy resource: moving from ‘fuel or food’ to ‘fuel and more food’
Source: Royal Society of Chemistry journal article supplement (doi:10.1039/c5ee00242g), 2015-01-01
Supplement: c5ee00242g1.pdf [file c5ee00242g1.pdf]

# THE POTENTIAL OF CAM CROPS AS A GLOBALLY SIGNIFICANT BIOENERGY RESOURCE: MOVING FROM FUEL OR FOOD TO FUEL AND MORE FOOD - ELECTRONIC SUPPLEMENTARY INFORMATION

**P. Michael Mason<sup>1,2\*</sup>, Katherine Glover<sup>2</sup>, J. Andrew C. Smith<sup>3</sup>, Kathy J. Willis<sup>4</sup>,  
Jeremy Woods<sup>5</sup>, Ian P. Thompson<sup>1</sup>**

<sup>1</sup> Department of Engineering Science, University of Oxford, Parks Road, Oxford, OX1 3PJ, UK

<sup>2</sup> Tropical Power Ltd., 58 Church Way, Oxford OX4 4EF, UK

<sup>3</sup> Department of Plants Sciences, University of Oxford, South Parks Road, Oxford, OX1 3RB, UK

<sup>4</sup> Royal Botanical Gardens, Kew, Richmond, Surrey TW9 3AB, UK

<sup>5</sup> Centre for Environmental Policy, Imperial College London, South Kensington, London, SW7 2AZ, UK

\*Corresponding author. Tel.: +441865 777771 Email: michael.mason@eng.ox.ac.uk

| <b>CONSTANTS</b>                        |              |                          |
|-----------------------------------------|--------------|--------------------------|
| Lower heating value of CH <sub>4</sub>  | 50.00        | MJ kg <sup>-1</sup>      |
| MW of CH <sub>4</sub>                   | 16.00        |                          |
| Molar volume                            | 22.42        | Litres mol <sup>-1</sup> |
| Density of CH <sub>4</sub> at STP       | 0.71         | kg m <sup>-3</sup>       |
| <i>Energy content of CH<sub>4</sub></i> | <i>35.68</i> | <i>MJ m<sup>-3</sup></i> |

| <b>ASSUMPTIONS</b>                                |          |                      |
|---------------------------------------------------|----------|----------------------|
| Engine efficiency                                 | 41.3%    |                      |
| Energy content of cellulosic biomass <sup>1</sup> | 18       | GJ dmt <sup>-1</sup> |
| Available land area                               | 2.50E+09 | Ha                   |

**Table ESI.1 Constants and assumptions used to calculate values in Table 4.** <sup>1</sup>Varies between 16 and 20 largely as a function of ash content; oily or high sugar crops maybe higher.
